# Supplementary material for: A transgenerational role of the germline nuclear RNAi pathway in repressing heat stress-induced transcriptional activation in C. elegans
Source: PubMed Central journal article supplement (PMC4714518; doi:10.1186/s13072-016-0052-x), 2016-01-15
Supplement: 13072_2016_52_MOESM5_ESM.pdf [file 13072_2016_52_MOESM5_ESM.pdf]

$\Delta$  H3K9me3  
(later generation / 15C\_G3)

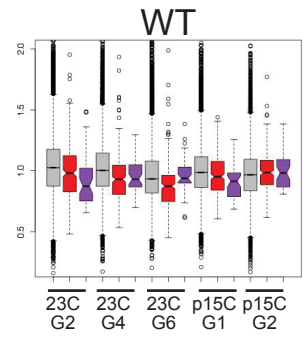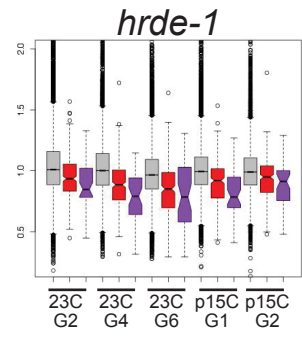

- all genes
- NHG
- high-stringent NHG
