# Supplementary material for: A transgenerational role of the germline nuclear RNAi pathway in repressing heat stress-induced transcriptional activation in C. elegans
Source: PubMed Central journal article supplement (PMC4714518; doi:10.1186/s13072-016-0052-x), 2016-01-15

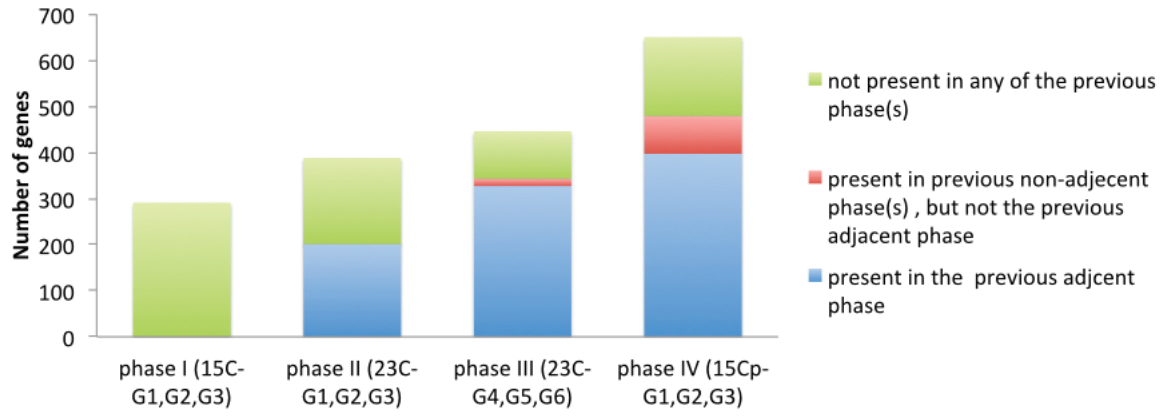

Supplement: 13072_2016_52_MOESM9_ESM.pdf [file 13072_2016_52_MOESM9_ESM.pdf]
